# Supplementary material
Source: PubMed Central journal article supplement (PMC6663613)
Supplement: NIHMS1025673-supplement-Supp_info.pdf [file NIHMS1025673-supplement-Supp_info.pdf]

| Site | Geology (*)    | Texture (**)   | O.M.(%) | pH   | %CaCO <sub>3</sub> |
|------|----------------|----------------|---------|------|--------------------|
| LP   | Limestones (7) | Clay –loam (5) | 4.73    | 7.86 | 33,25              |
| SCF  | Granitoids (1) | Loamy sand (2) | 2.83    | 7.11 | 4,81               |

**Table S1.** Physical and chemical properties of soils from common garden field experiment locations at Les Planes (LP) and Santa Coloma de Farnes (SCF). (Geology: numbers from more to less silicate. (\*\*)) texture: numbers from more to less sand

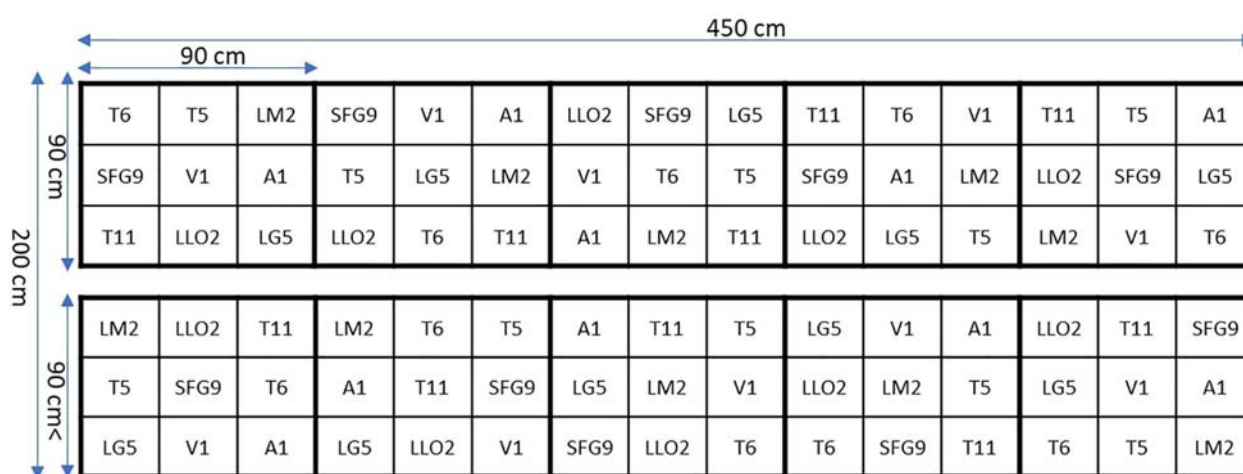

**Table S2.** Map of cultivation frame. Big square represents the space used for the common garden experiment (450 cm x 200 cm). In each 90 x 90 square all demes were present and randomly distributed; in each small subsquare (30 cm x 30 cm) 2 plants per deme were cultivated.

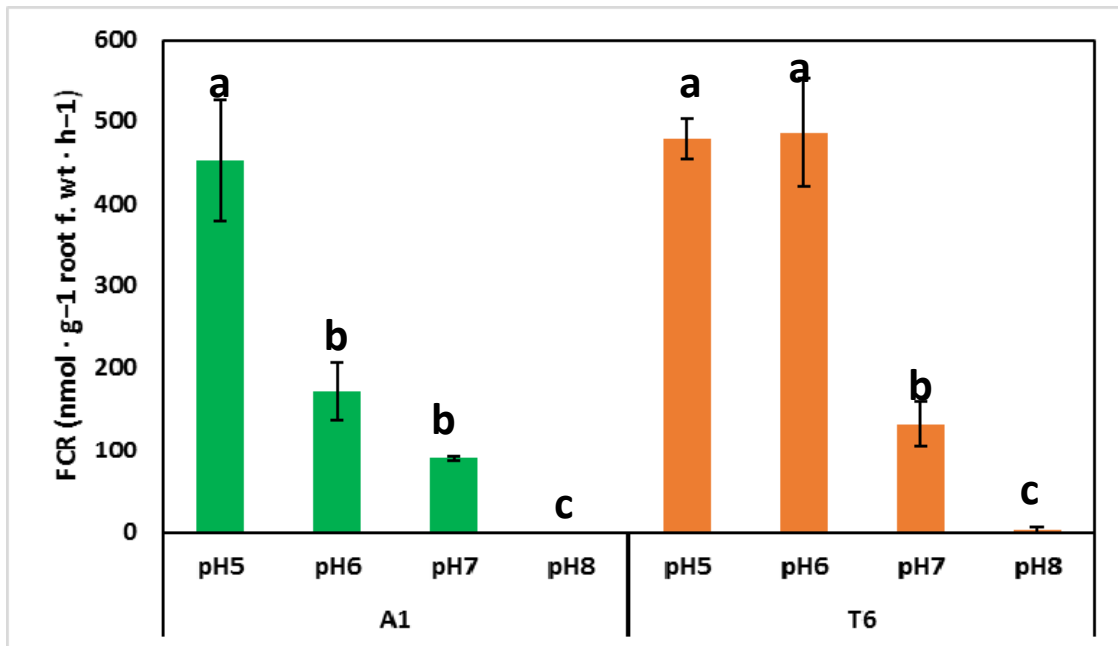

**Figure S1.** Activity of ferric chelate reductase (FCR) in roots of carbonate tolerant A1<sub>(+C)</sub> and carbonate sensitive T6<sub>(-C)</sub> measured after 30 min exposure to solution without Fe and at different pH. Values are means ± SE (n =4).

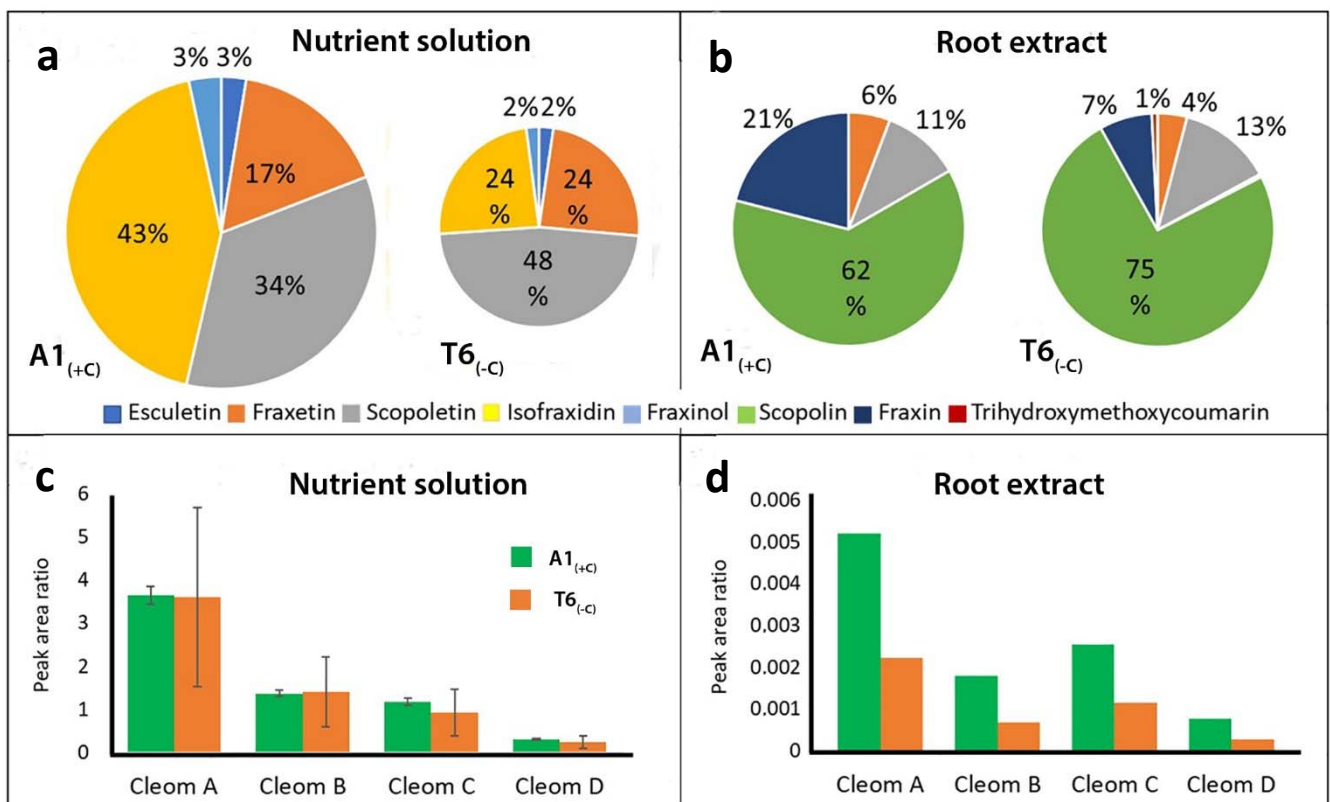

**Figure S2.** Percent distribution of coumarins in *A. thaliana* root exudates (a) and root extracts (b) from carbonate tolerant A1<sub>(+C)</sub> and carbonate sensitive T6<sub>(-C)</sub>; the circle diameter is proportional to the actual exudation amount. Relative amounts (peak areas) of coumarinolignans in nutrient solution from carbonate tolerant A1<sub>(+C)</sub> and carbonate sensitive T6<sub>(-C)</sub>; values are means ± SE (n=3) (c); (d) coumarinolignans from root extracts; due to low concentrations, all extracts were pooled into a single sample.
